# Supplementary material for: A Novel Chitosan/Nano-Hydroxyapatite Composite for the Adsorptive Removal of Cd(II) from Aqueous Solution
Source: MDPI journal article supplement (doi:10.3390/polym15061524), 2023-03-19
Supplement: s1 [file s1]

## Supplementary Data

# Chitosan/nanohydroxyapatite biocomposite for divalent cadmium ions removal from water

**Table S1.** Kinetic models used.

| Kinetic model            | Linear equation                                                      |
|--------------------------|----------------------------------------------------------------------|
| Pseudo first order       | $\log(q_e - q_t) = \log q_e - k_1 t$                                 |
| Pseudo second order      | $\frac{t}{q_t} = \frac{1}{k_2 q_e^2} + \left(\frac{1}{q_e}\right) t$ |
| Intra-particle diffusion | $q_t = k_{id} \sqrt{t} + C_i$                                        |

$k_1$  and  $k_2$  are the rate constants for pseudo-first-order and pseudo-second-order kinetic models respectively,  $k_{id}$  is intra-particle diffusion constant and  $C_i$  measures the thickness of the layer.

**Table S2.** Used isotherm models.

| Isotherm model | Linear equation                                           |
|----------------|-----------------------------------------------------------|
| Langmuir       | $\frac{C_e}{q_e} = \frac{1}{k_L q_m} + \frac{1}{q_m} C_e$ |
| Freundlich     | $\ln q_e = \ln k_F + \frac{1}{n} \ln C_e$                 |

$q_m$  is the maximum monolayer adsorption capacity of the adsorbent,  $k_L$  and  $k_F$  are Langmuir and Freundlich constants, respectively.

**Table S3.** Comparison of maximum monolayer adsorption capacities of Cd(II) on various adsorbents.

| Adsorbent                                                                     | Experimental conditions            | $q_{\max}$<br>(mg/g) | Reference  |
|-------------------------------------------------------------------------------|------------------------------------|----------------------|------------|
| Ash/GO/Fe <sub>3</sub> O <sub>4</sub>                                         | m: 1 g/L, t: 1h, pH: 6             | 47.16                | [54]       |
| Sulfhydryl modified attapulgite                                               | m: 1 g/L, t: 2h, pH: 6.5           | 22.71                | [55]       |
| Phosphate sludge/alginate composite                                           | m:1 g/L, T: 25 °C, t: 3 h, pH: 7   | 54.27                | [53]       |
| Cs-silica hybrid aerogel                                                      | t: 6 h, pH: 3                      | 67.57                | [25]       |
| Alginate hydrogel                                                             | m:1 g/L, T: 25 °C, t: 3 h, pH: 7   | 68.15                | [15]       |
| Gelatin/clinoptilolite hybrid nanocomposite                                   | T: 25 °C, t: 1 h                   | 78.13                | [56]       |
| Thiol-functionalized mesoporous silica                                        | m: 0.1 g/L, t: 6 h, pH: 7          | 85.0                 | [57]       |
| Carboxylic acid-functionalized fibrous Silica KCC-1/polyamide 6 nanocomposite | m:1.67 g/L, t: 4h, T: 25 °C, pH: 7 | 109.2                | [58]       |
| Hap modified sludge-based biochar                                             | m:1 g/L, t: 24h, T: 25 °C          | 114.68               | [27]       |
| Cs/n-Hap                                                                      | m: 2 g/L, t: 1.5 h, pH: 6          | 126.65               | This study |

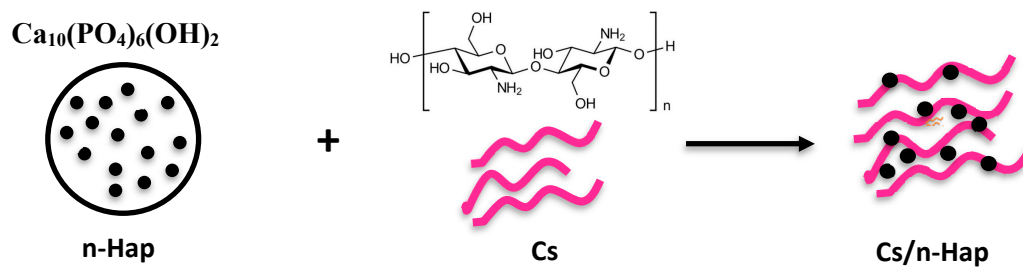

Figure S1. Schematic presentation of Cs/n-Hap bio-composite synthesis.

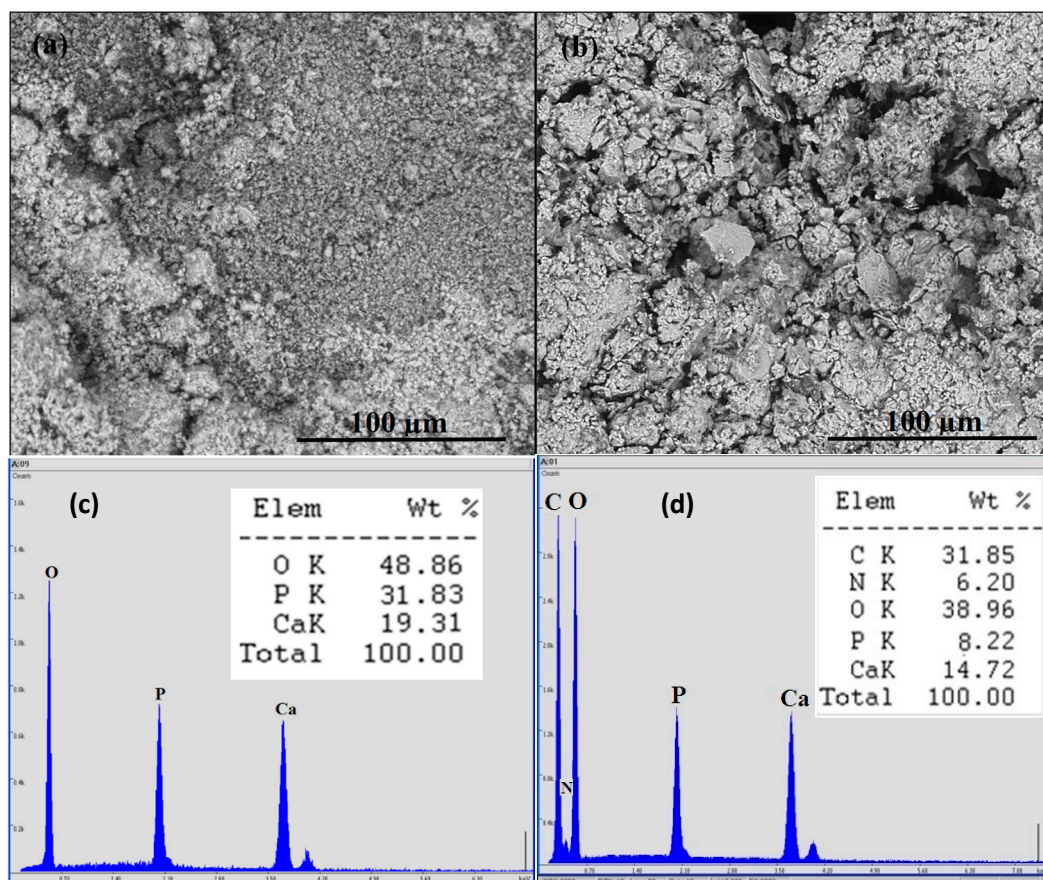

Figure S2. SEM micrographs and EDX analysis of (a, c) n-Hap, and (b, d) Cs/n-Hap bio-composite.

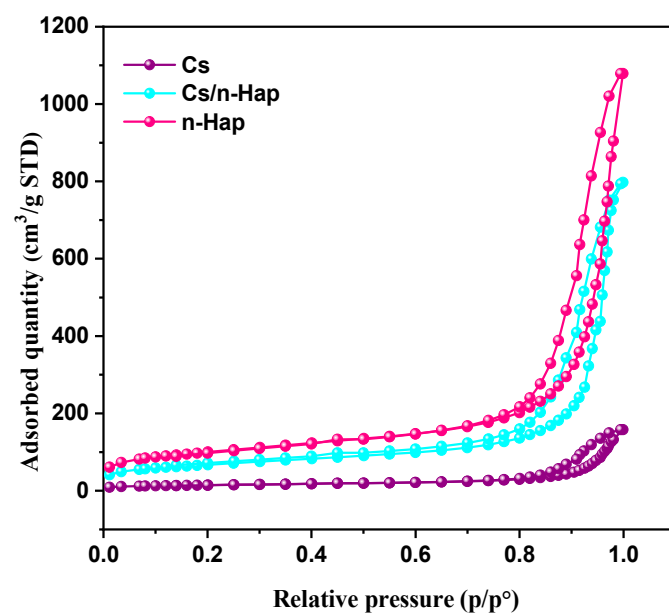

Figure S3.  $\text{N}_2$  adsorption/desorption isotherms of Cs, n-Hap and Cs/n-Hap.

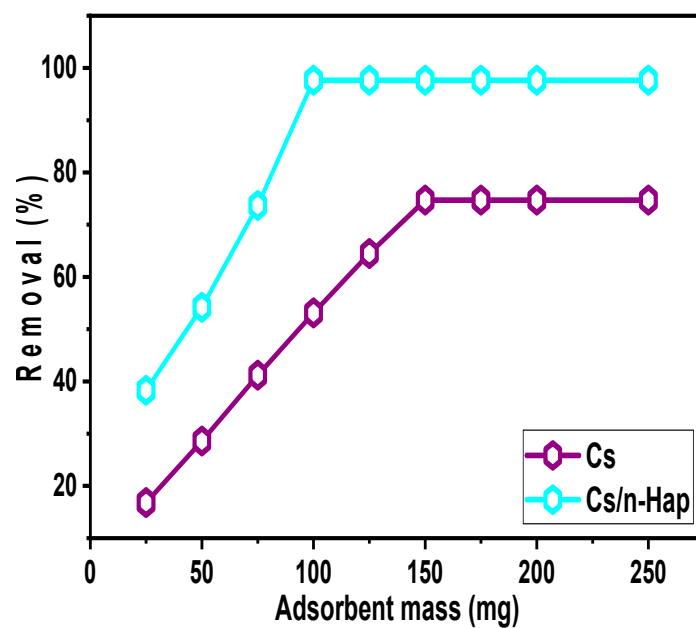

Figure S4. Effect of the adsorbents concentration on Cd(II) removal. (Contact time: 120 min; pH = 6.0;  $C_0 = 100 \text{ mg/L}$ , and  $T = 25^\circ\text{C}$ ).

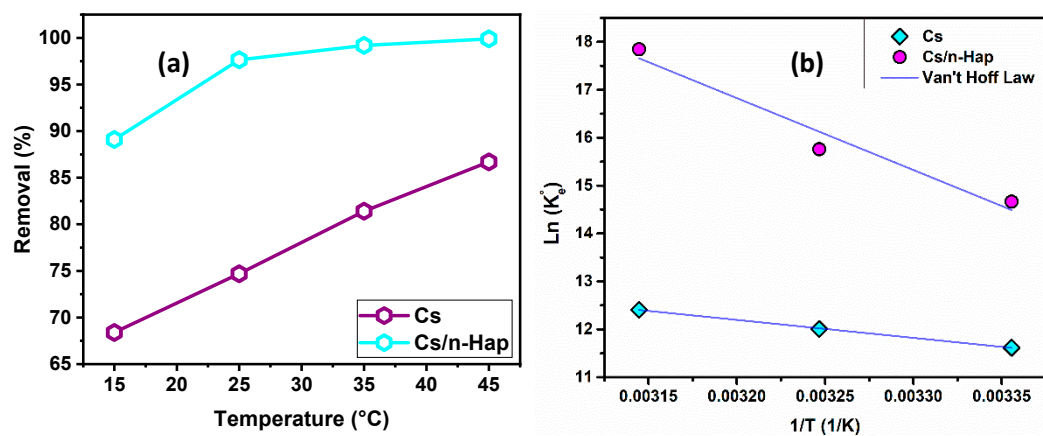

Figure S5. (a) Effect of temperature on Cd(II) adsorption onto Cs and Cs/n-Hap, (b) Van't Hoff plot for Cd(II) adsorption onto Cs and Cs/n-Hap.
